# Supplementary material for: Absolute Humidity and the Seasonal Onset of Influenza in the Continental United States
Source: PubMed Central journal article supplement (PMC2826374; doi:10.1371/journal.pbio.1000316), 2010-02-23

**A) Weekly P&I mortality rate time series, USA**

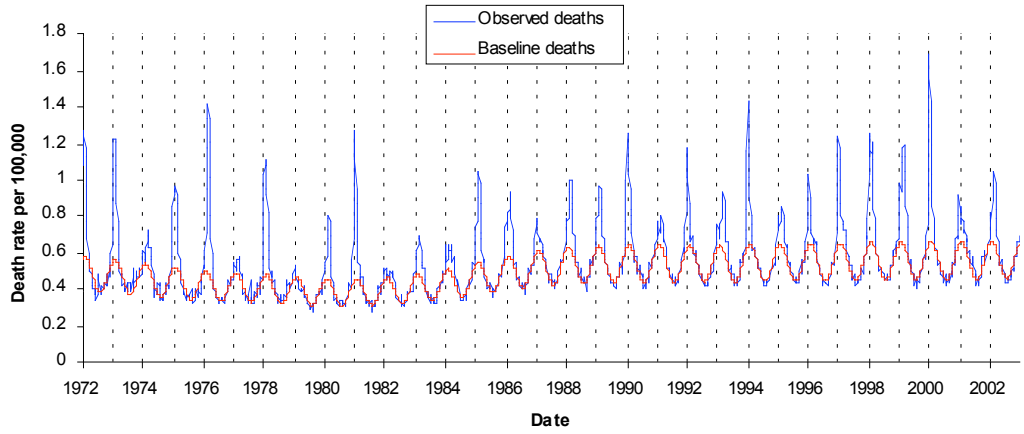

**B) Weekly excess P&I mortality rate time series, USA**

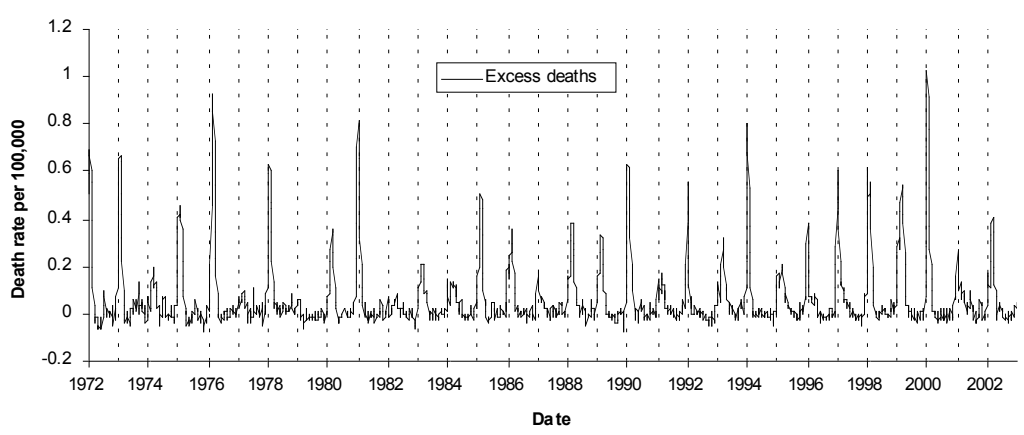

Supplement: pbio.1000316.s001.pdf [file pbio.1000316.s001.pdf]
